# Supplementary material
Source: publisher figshare collection journal article supplement (https://tandf.figshare.com/ndownloader/files/22447895)

Figure 1

The photographs of composite steamed breads made by EP and UP


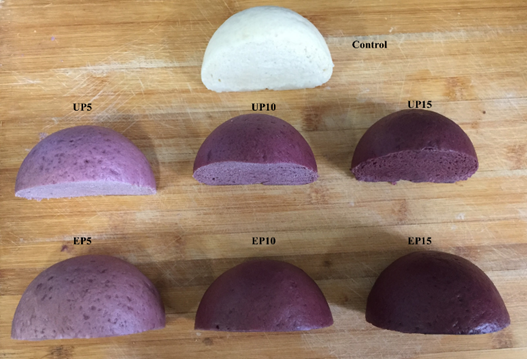


Fig.1

Supplement: Supplementary file 1 [file 22447895]
